# Supplementary material for: Metamagnetism in a π-stacked bis-dithiazolyl radical
Source: Royal Society of Chemistry journal article supplement (doi:10.1039/b917213k), 2009-01-01
Supplement: b917213k.pdf [file b917213k.pdf]

## Electronic Supporting Information

### Metamagnetism in a $\pi$ -stacked *bis*-dithiazolyl radical

*Stephen M. Winter, Kristina Cvrkalj, Craig M. Robertson, Michael R. Probert, Paul A. Dube,  
Judith A. K. Howard and Richard T. Oakley\**

Department of Chemistry, University of Waterloo, Waterloo, Ontario N2L 3G1, Canada;  
Department of Chemistry, University of Durham, Durham DH1 3LE, UK; Brockhouse Institute for  
Materials Science, McMaster University, Hamilton, Ontario L8S 4L8, Canada

E-mail: oakley@uwaterloo.ca

#### Contents

|                   |                                              |         |
|-------------------|----------------------------------------------|---------|
| <b>Figure S1.</b> | Fitting of the Magnetic Data for <b>1a</b> . | Page S2 |
| <b>Table S1.</b>  | Calculated Exchange Energies for <b>1a</b> . | Page S3 |

**Figure S1.** Fitting of the Magnetic Data for **1a**.

The low temperature ( $T = 10\text{-}80\text{ K}$ ) magnetic susceptibility of **1a** was fitted (Equation 1) to the Baker 1D  $S = \frac{1}{2}$  FM chain model<sup>1</sup> modified to include a molecular field parameter ( $zJ'$ ) to account for interchain interactions (Equation 2). Contributions from Temperature Independent Paramagnetism (TIP) and Curie-Weiss impurities ( $\alpha$ ) were also included (Equation 3).

$$\chi_{1D} = \frac{Ng^2\beta^2}{4k(T-\theta)} \left[ \frac{1.0 + 5.7979916X + 16.902653X^2 + 29.376885X^3 + 29.832959X^4 + 14.036918X^5}{1.0 + 2.7979916X + 7.0086780X^2 + 8.653644X^3 + 4.5743114X^4} \right]^{2/3} \quad (\text{Eqn 1})$$

$$\text{where } X = \frac{|J|}{2kT}$$

$$\chi_{2D} = \frac{\chi_{1D}}{1 - \frac{2(zJ')\chi_{1D}}{Ng^2\beta^2}} \quad (\text{Eqn 2}) \quad \chi_{\text{calc}} = \left\{ \frac{\alpha [Ng^2\beta^2 S(S+1)]}{3kT} + \text{TIP} + [1 - \alpha]\chi_{2D} \right\} \quad (\text{Eqn 3})$$

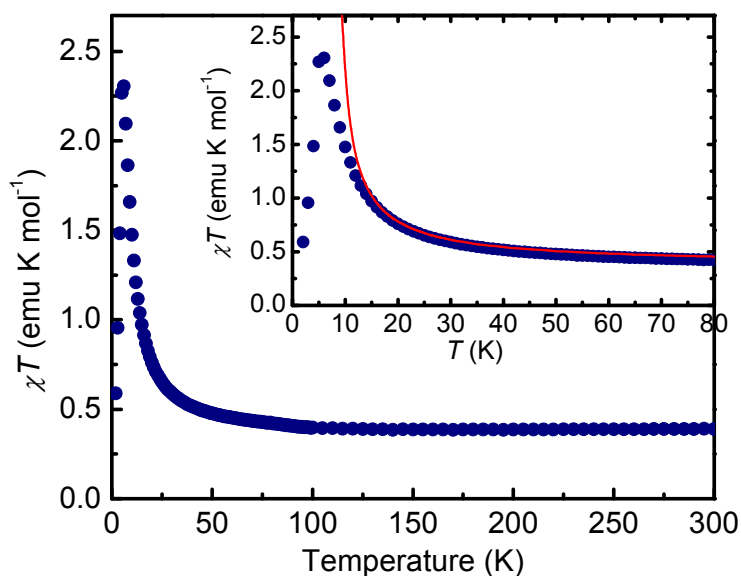

Baker Fit to data from 10 - 80 K:

$J = +6.17\text{ cm}^{-1}$ ,  $zJ' = +4.90\text{ cm}^{-1}$ ,  
 $g = 2.008$ ,  $\theta = 0.00\text{ K}$ ,  $\alpha = 0.000$ ,  
 TIP =  $0.0001\text{ emu mol}^{-1}$ ,  $R(\chi) = 0.0279$ .\*

$$*R(\chi) = [\Sigma(\chi_{\text{obs}} - \chi_{\text{calc}})^2 / \Sigma(\chi_{\text{obs}})^2]^{1/2}$$

<sup>1</sup>G. A. Baker, G. S. Rushbrooke and H. E. Gilbert, *Phys. Rev.*, 1964, **135**, A1272.

**Table S1.** Calculated Exchange Energies for **1a**.

*Triplet and broken symmetry singlet (guess=mix) energies were derived from single point calculations, performed using Gaussian 03W<sup>2</sup> at the UB3LYP/6-311G(d,p) level, with SCF = tight. Atomic coordinates were taken from crystallographic data at T = 35 K, 100 K and 293 K.*

$$J = \frac{-(E_{TS} - E_{BSS})}{\langle S^2 \rangle_{TS} - \langle S^2 \rangle_{BSS}}$$

| 35K Data | Distance | Triplet (H)    | <S2>TS | BS Singlet (H) | <S2>BSS | J (cm-1) |
|----------|----------|----------------|--------|----------------|---------|----------|
| J-pi     | a        | -3976.23200484 | 2.0658 | -3976.23197128 | 1.0648  | 7.36     |
| J1       | d1       | -3976.23434226 | 2.0658 | -3976.23431841 | 1.0656  | 5.23     |
| J2       | d2       | -3976.23460916 | 2.0651 | -3976.23461072 | 1.0634  | -0.34    |
| J2'      | d2'      | -3976.23535937 | 2.066  | -3976.23536298 | 1.066   | -0.79    |
| J3       | d3       | -3976.23493400 | 2.0655 | -3976.23492227 | 1.0654  | 2.57     |
| J3'      | d3'      | -3976.23489758 | 2.0658 | -3976.23489514 | 1.0655  | 0.54     |

| 100K Data | Distance | Triplet (H)    | <S2>TS | BS Singlet (H) | <S2>BSS | J (cm-1) |
|-----------|----------|----------------|--------|----------------|---------|----------|
| J-pi      | a        | -3976.26681602 | 2.0624 | -3976.26680431 | 1.0601  | 2.56     |
| J1        | d1       | -3976.26921639 | 2.0625 | -3976.26919188 | 1.0624  | 5.38     |
| J2        | d2       | -3976.26950498 | 2.0619 | -3976.26950888 | 1.0602  | -0.85    |
| J2'       | d2'      | -3976.26998528 | 2.0628 | -3976.26999009 | 1.0627  | -1.06    |
| J3        | d3       | -3976.26955878 | 2.0623 | -3976.26954789 | 1.0622  | 2.39     |
| J3'       | d3'      | -3976.26973302 | 2.0626 | -3976.26973487 | 1.0621  | -0.41    |

| 293K Data | Distance | Triplet (H)    | <S2>TS | BS Singlet (H) | <S2>BSS | J (cm-1) |
|-----------|----------|----------------|--------|----------------|---------|----------|
| J-pi      | a        | -3976.14485469 | 2.0655 | -3976.14482875 | 1.0637  | 5.68     |
| J1        | d1       | -3976.14576298 | 2.0658 | -3976.14574174 | 1.0656  | 4.66     |
| J2        | d2       | -3976.14580607 | 2.065  | -3976.14580435 | 1.0636  | 0.38     |
| J2'       | d2'      | -3976.14619568 | 2.0658 | -3976.14619810 | 1.0658  | -0.53    |
| J3        | d3       | -3976.14597107 | 2.0655 | -3976.14596017 | 1.0655  | 2.39     |
| J3'       | d3'      | -3976.14598720 | 2.0658 | -3976.14598843 | 1.0654  | -0.27    |

<sup>2</sup>Gaussian 03, Revision C.02:

M. J. Frisch, G. W. Trucks, H. B. Schlegel, G. E. Scuseria, M. A. Robb, J. R. Cheeseman, J. A. Montgomery, Jr., T. Vreven, K. N. Kudin, J. C. Burant, J. M. Millam, S. S. Iyengar, J. Tomasi, V. Barone, B. Mennucci, M. Cossi, G. Scalmani, N. Rega, G. A. Petersson, H. Nakatsuji, M. Hada, M. Ehara, K. Toyota, R. Fukuda, J. Hasegawa, M. Ishida, T. Nakajima, Y. Honda, O. Kitao, H. Nakai, M. Klene, X. Li, J. E. Knox, H. P. Hratchian, J. B. Cross, V. Bakken, C. Adamo, J. Jaramillo, R. Gomperts, R. E. Stratmann, O. Yazyev, A. J. Austin, R. Cammi, C. Pomelli, J. W. Ochterski, P. Y. Ayala, K. Morokuma, G. A. Voth, P. Salvador, J. J. Dannenberg, V. G. Zakrzewski, S. Dapprich, A. D. Daniels, M. C. Strain, O. Farkas, D. K. Malick, A. D. Rabuck, K. Raghavachari, J. B. Foresman, J. V. Ortiz, Q. Cui, A. G. Baboul, S. Clifford, J. Cioslowski, B. B. Stefanov, G. Liu, A. Liashenko, P. Piskorz, I. Komaromi, R. L. Martin, D. J. Fox, T. Keith, M. A. Al-Laham, C. Y. Peng, A. Nanayakkara, M. Challacombe, P. M. W. Gill, B. Johnson, W. Chen, M. W. Wong, C. Gonzalez, and J. A. Pople, Gaussian, Inc., Wallingford CT, 2004.
